# Supplementary material
Source: publisher figshare collection journal article supplement (https://tandf.figshare.com/articles/dataset/_/24597294)

**About the author**

Mzingaye Brilliant Xaba is a postdoctoral research fellow at the Institute for Pan African Thought and Conversation (IPATC), at the University of Johannesburg, in South Africa. His key research activities are on land, anti-mining struggles, shale gas mining, community health dynamics and many other areas. This article forms part of his broader research on the land questions in Southern Africa.

Below is Mzingaye Brilliant Xaba’s photo


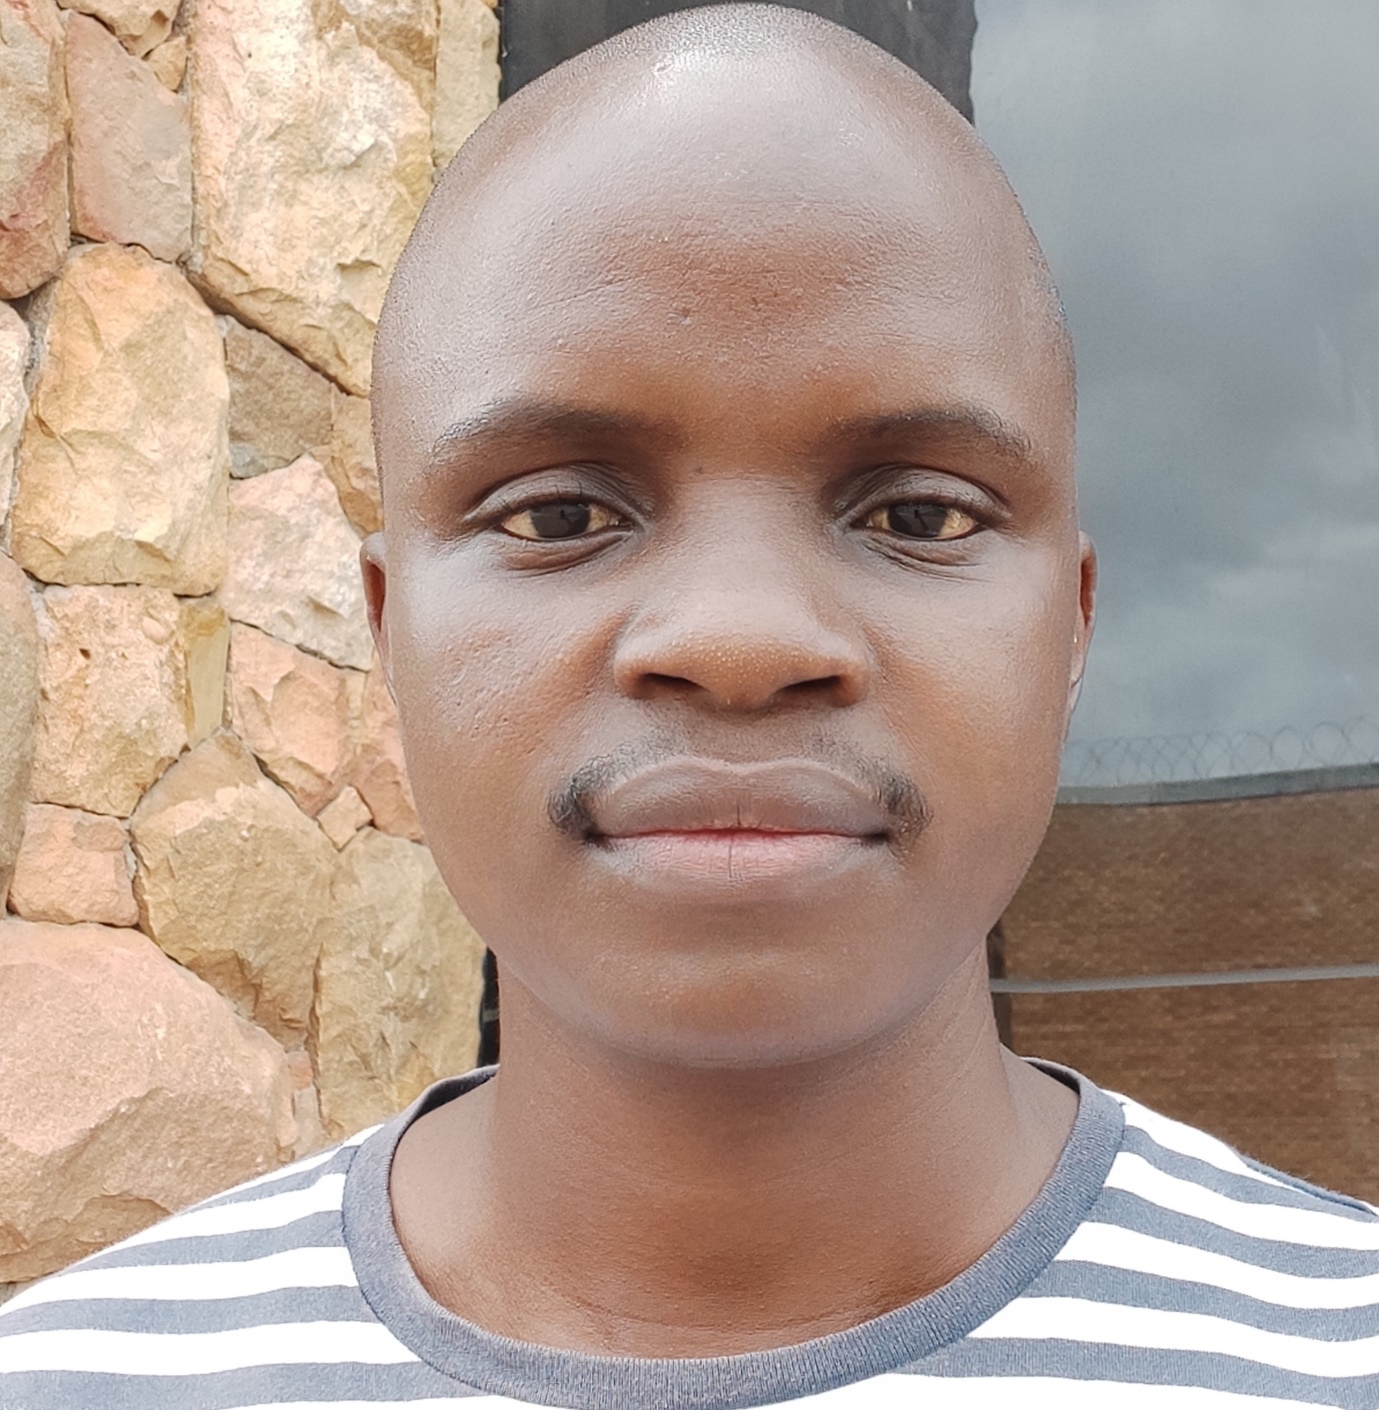

Supplement: Supplementary file 1 [file 1]
